# Supplementary material for: Monitoring the macrophage response towards biomaterial implants using label-free imaging
Source: PubMed Central journal article supplement (PMC10285553; doi:10.1016/j.mtbio.2023.100696), 2023-06-13
Supplement: mmc1.pdf [file mmc1.pdf]

## Supplementary Information

### Monitoring the Macrophage Response to Biomaterial Implants Ex vivo Using Raman Microspectroscopy

Chuan-en Lu<sup>1</sup>, Ruth E Levey<sup>2</sup>, Giulio Gherzi<sup>3,4</sup>, Nathan Schueller<sup>1</sup>, Simone Liebscher<sup>1</sup>, Shannon L Layland<sup>1</sup>, Katja Schenke-Layland<sup>1, 5, 6</sup>, Garry P Duffy<sup>2, 7</sup>, Julia Marzi<sup>1, 5, 6\*</sup>

| Raman shifts (cm <sup>-1</sup> ) | Biological assignment                         |
|----------------------------------|-----------------------------------------------|
| 1651                             | Amide I[1]                                    |
| 1623                             | Tryptophan[2]                                 |
| 1611                             | Tyrosine[3]                                   |
| 1579                             | Pyrimidine ring[4]                            |
| 1488                             | Guanine (N7)[5]                               |
| 1448                             | Collagen[6]                                   |
| 1379                             | CH <sub>3</sub> [4]                           |
| 1342                             | Guanine[7]                                    |
| 1330                             | DNA and phospholipids[8, 9]                   |
| 1321                             | Amide III ( $\alpha$ -helix)[10]              |
| 1309                             | CH <sub>3</sub> /CH <sub>2</sub> twisting[11] |
| 1114                             | NH <sub>3</sub> [12]                          |
| 1043                             | Proline[13]                                   |
| 1004                             | Phenylalanine[11]                             |
| 972                              | C-C backbone[13]                              |
| 923                              | C-C backbone[13]                              |
| 879                              | Tryptophan, Hydroxyproline[11]                |
| 857                              | Tyrosine, hydroxyproline[11, 14]              |
| 856                              | Proline, hydroxyproline[11]                   |
| 815                              | Proline, hydroxyproline[11]                   |
| 786                              | 5-Methylcytosine[15, 16]                      |
| 725                              | Adenine[17]                                   |

Supplementary Table 1: Biological assignments of relevant Raman peaks.

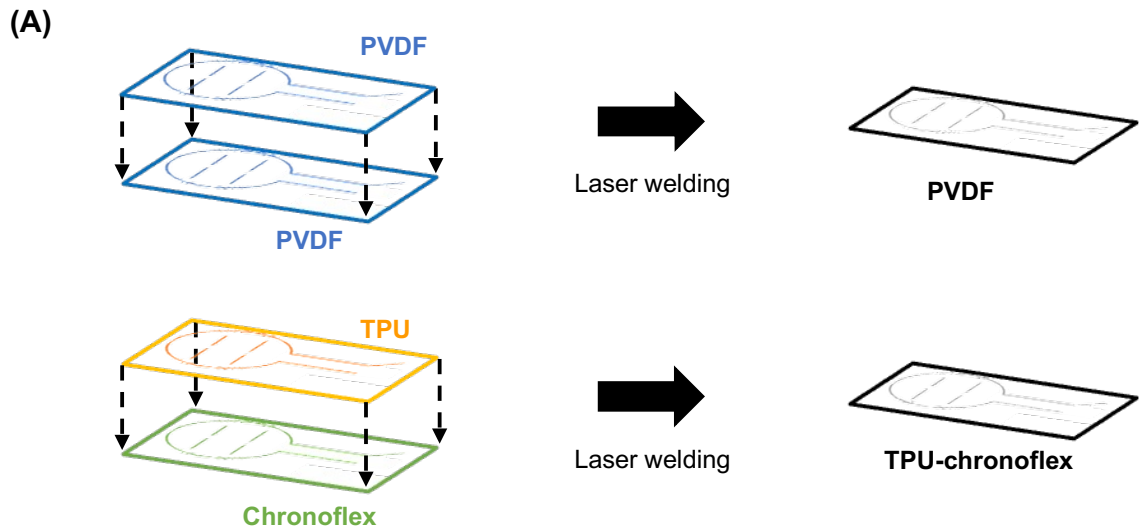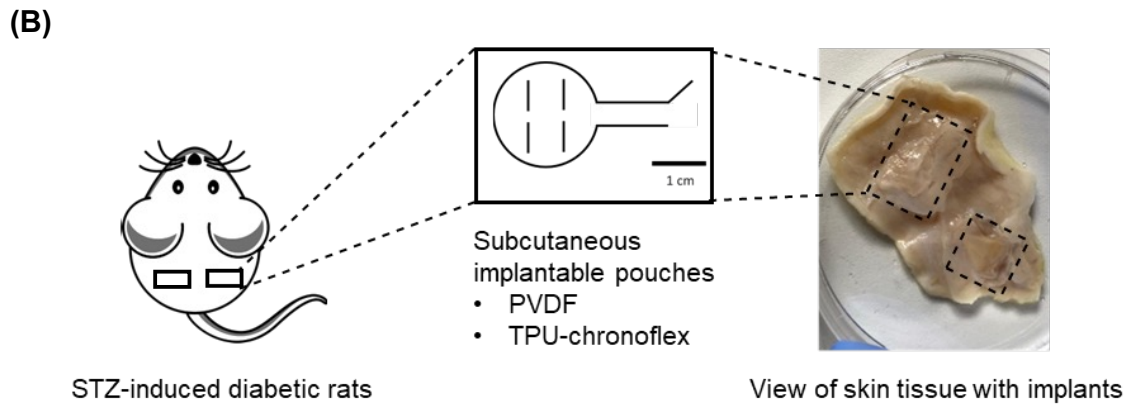

**Supplementary figure 1. Implantable pouches and scheme of study design.** (A) Fabricated sheets, PVDF and TPU-chronoflex with 50  $\mu\text{m}$  thickness and 2  $\mu\text{m}$  pore size, generated by laser-welding method. (B) Diabetes was induced by utilizing STZ 14 days before implantation. PVDF and TPU-chronoflex pouches were implanted subcutaneously at the back of the diabetic rats over 15 days.

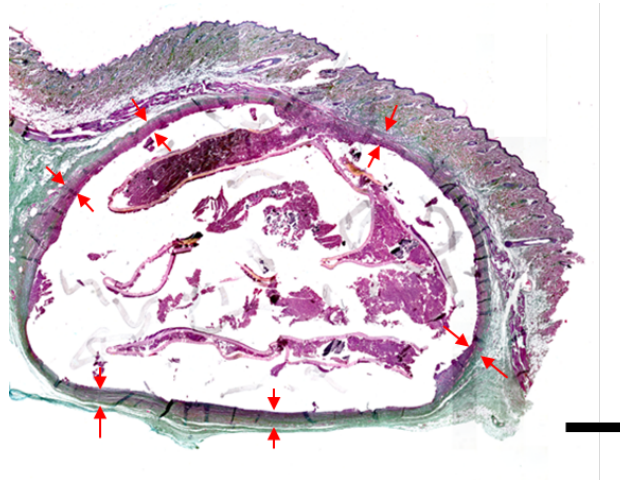

**Supplementary figure 2.** Depiction of capsular thickness measurement from three regions of fibrotic capsule at the upper layer of the implant and 3 sections from the bottom. scale bar equals 1 mm.

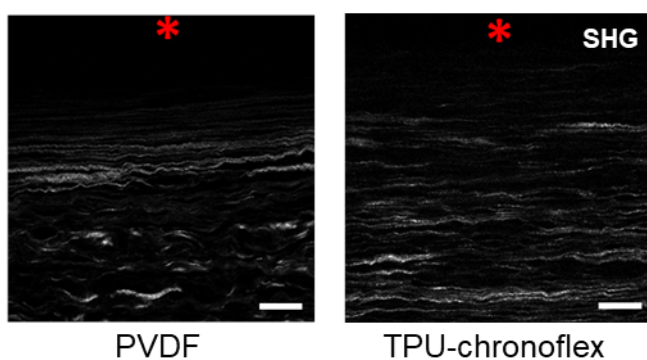

**Supplementary figure 3.** Second harmonic generation (SHG) signals of Collagens in PVDF and TPU-chronoflex groups. Red asterisk: implant side. Scale bars = 20  $\mu\text{m}$ .

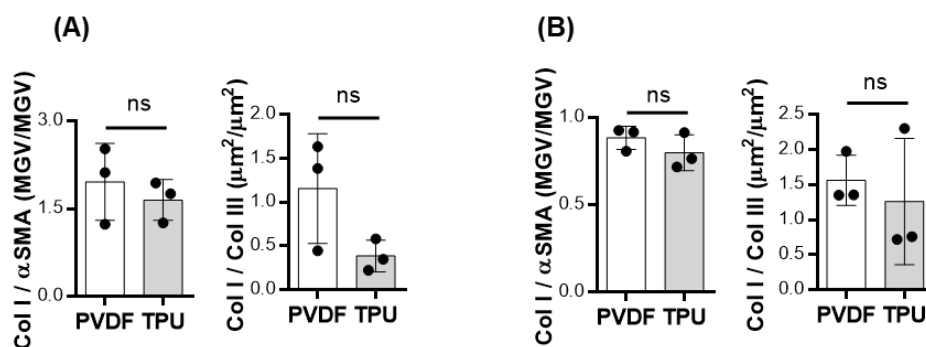

**Supplementary figure 4.** Ratio Quantification of Col I, Col III and  $\alpha\text{SMA}$  in the fibrotic capsule. (A) IF imaging (B) Raman imaging. N=3, t test,  $p^* \leq 0.05$ .

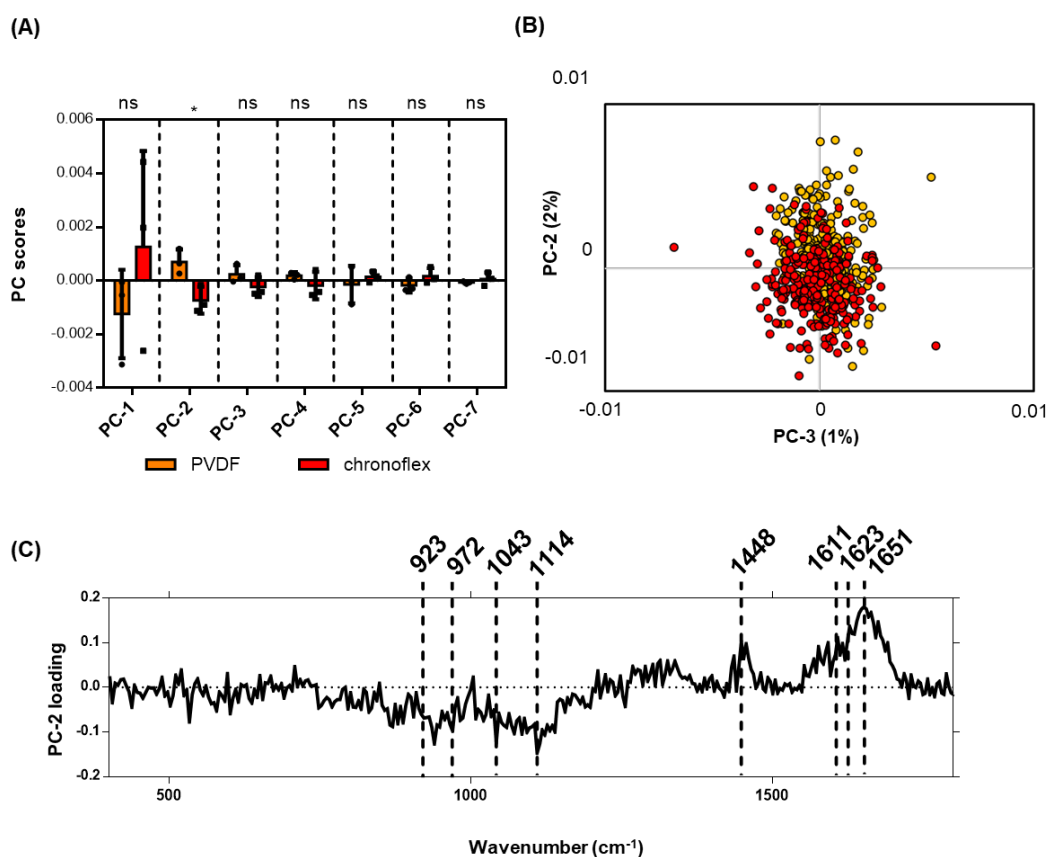

**Supplementary Figure 5. Multivariate analysis discriminates Col I composition in PVDF and TPU-chronoflex samples. (A)** Average PC-score values of Col I spectra indicate significant difference of fibrotic tissues between two implants in PC-2.  $n=3$ ,  $p^* < 0.05$ . **(B)** PC-2 vs PC-3 scores plot shows a separation in fibrotic capsule Col I features between PVDF and TPU-chronoflex. **(C)** PC-2 loadings identifies relevant spectral changes in Col I spectra.

## References

- [1] P.J. Caspers, H.A. Bruining, G.J. Puppels, G.W. Lucassen, E.A. Carter, *In Vivo* Confocal Raman Microspectroscopy of the Skin: Noninvasive Determination of Molecular Concentration Profiles, *Journal of Investigative Dermatology* 116(3) (2001) 434-442.
- [2] N. Huang, M. Short, J. Zhao, H. Wang, H. Lui, M. Korbelik, H. Zeng, Full range characterization of the Raman spectra of organs in a murine model, *Opt Express* 19(23) (2011) 22892-909.
- [3] H. Abramczyk, A. Imiela, B. Brożek-Płuska, M. Kopeć, J. Surmacki, A. Śliwińska, Aberrant Protein Phosphorylation in Cancer by Using Raman Biomarkers, *Cancers* 11(12) (2019) 2017.
- [4] N. Stone, C. Kendall, J. Smith, P. Crow, H. Barr, Raman spectroscopy for identification of epithelial cancers, *Faraday Discuss* 126 (2004) 141-57; discussion 169-83.
- [5] A. Ruiz-Chica, M. Medina, F. Sánchez-Jiménez, F. Ramírez, Characterization by Raman spectroscopy of conformational changes on guanine–cytosine and adenine–thymine oligonucleotides induced by aminoxy analogues of spermidine, *Journal of Raman Spectroscopy* 35 (2004) 93-100.
- [6] S. Kaminaka, H. Yamazaki, T. Ito, E. Kohda, H.-o. Hamaguchi, Near-infrared Raman spectroscopy of human lung tissues: possibility of molecular-level cancer diagnosis, *Journal of Raman Spectroscopy* 32(2) (2001) 139-141.
- [7] Z. Liu, C. Davis, W. Cai, L. He, X. Chen, H. Dai, Circulation and long-term fate of functionalized, biocompatible single-walled carbon nanotubes in mice probed by Raman spectroscopy, *Proceedings of the National Academy of Sciences* 105(5) (2008) 1410-1415.

- [8] U. Utzinger, D.L. Heintzelman, A. Mahadevan-Jansen, A. Malpica, M. Follen, R. Richards-Kortum, Near-Infrared Raman Spectroscopy for in Vivo Detection of Cervical Precancers, *Appl. Spectrosc.* 55(8) (2001) 955-959.
- [9] R. Malini, K. Venkatakrishna, J. Kurien, K.M. Pai, L. Rao, V.B. Kartha, C.M. Krishna, Discrimination of normal, inflammatory, premalignant, and malignant oral tissue: a Raman spectroscopy study, *Biopolymers* 81(3) (2006) 179-93.
- [10] R. Jyothi Lakshmi, V.B. Kartha, C. Murali Krishna, R.S. JG, G. Ullas, P. Uma Devi, Tissue Raman spectroscopy for the study of radiation damage: brain irradiation of mice, *Radiat Res* 157(2) (2002) 175-82.
- [11] W.T. Cheng, M.T. Liu, H.N. Liu, S.Y. Lin, Micro-Raman spectroscopy used to identify and grade human skin pilomatrixoma, *Microsc Res Tech* 68(2) (2005) 75-9.
- [12] K.I. Hadjiivanov, D.A. Panayotov, M.Y. Mihaylov, E.Z. Ivanova, K.K. Chakarova, S.M. Andonova, N.L. Drenchev, Power of Infrared and Raman Spectroscopies to Characterize Metal-Organic Frameworks and Investigate Their Interaction with Guest Molecules, *Chemical Reviews* 121(3) (2021) 1286-1424.
- [13] F. Bonnier, H.J. Byrne, Understanding the molecular information contained in principal component analysis of vibrational spectra of biological systems, *Analyst* 137(2) (2012) 322-32.
- [14] C.A. Lieber, H.E. Nethercott, M.H. Kabeer, Cancer field effects in normal tissues revealed by Raman spectroscopy, *Biomed. Opt. Express* 1(3) (2010) 975-982.
- [15] R. Daum, E.M. Brauchle, D.A.C. Berrio, T.P. Jurkowski, K. Schenke-Layland, Non-invasive detection of DNA methylation states in carcinoma and pluripotent stem cells using Raman microspectroscopy and imaging, *Scientific Reports* 9(1) (2019) 7014.
- [16] A. Barhoumi, N.J. Halas, Detecting Chemically Modified DNA Bases Using Surface-Enhanced Raman Spectroscopy, *The Journal of Physical Chemistry Letters* 2(24) (2011) 3118-3123.
- [17] J.W. Chan, D.S. Taylor, T. Zwerdling, S.M. Lane, K. Ihara, T. Huser, Micro-Raman spectroscopy detects individual neoplastic and normal hematopoietic cells, *Biophys J* 90(2) (2006) 648-56.
